# Supplementary material for: Nutrient regime shift in the western North Atlantic indicated by compound-specific δ 15 N of deep-sea gorgonian corals
Source: HighWire-hosted journal article supplement (doi:10.1073/pnas.1004904108), 2011-01-03
Supplement: pnas.1004904108_SI.pdf [file pnas.1004904108_SI.pdf]

# Supporting Information

Sherwood et al. 10.1073/pnas.1004904108

## SI Text

**1 Construction of  $\delta^{15}\text{N}$  Time Series.** The recent (AD 1926–2001) bulk  $\delta^{15}\text{N}$  stable isotope record (Fig. S1) was derived from six specimens of *P. resedaeformis*. Use of multiple colonies from the same location allows for quantification of inter-colony reproducibility and contributes to greater confidence in our interpretations. Where multiple sections per colony were analyzed, the time-series records were averaged. Annual means ( $\pm 95\%$  confidence intervals) were calculated with a mixed effects linear model with year as the fixed effect and colony as the random effect using the ProcMixed program in the statistical software SAS.

**2 Cross-Correlation Analysis.** Climate and stable isotope time-series records were strongly autocorrelated, even after detrending. Autocorrelation is a problem in cross-correlation analysis because it violates the assumption of sample independence among observations and increases the likelihood of identifying significant correlations where none exist (1). The traditional practice of removing autocorrelation by first-differencing or prewhitening data to control for this effect inflates the rate of Type II error, and thus decreases statistical power (2). We used an alternative, robust method of adjusting the degrees of freedom to account for autocorrelation that has the advantage of conserving both Type I and Type II error rates (“modified Chelton” method) (2). Correlations and probability levels (90 and 95%) were calculated over N/5 lags on the detrended time series (Fig. S2). Monte Carlo estimates of Type I error were checked by randomizing one time series with respect to another and counting the number of significant ( $p < 0.05$ ) correlations in 1000 simulations. In all cases, the number of significant correlations was  $< 5\%$ .

**3 Northeast Channel Nitrate Data.** Phytoplankton preferentially assimilate  $^{14}\text{N}$  over  $^{15}\text{N}$  during growth on  $\text{NO}_3^-$  (3, 4). As a result, they initially have lower  $\delta^{15}\text{N}$  than  $\text{NO}_3^-$ . As nutrients are consumed, the  $\delta^{15}\text{N}$  of both the phytoplankton and residual  $\text{NO}_3^-$  increase following Rayleigh fractionation kinetics (5, 6). In continental shelf and slope settings spring and autumn blooms often lead to complete drawdown of euphotic zone  $\text{NO}_3^-$ . Because all of the nitrate is converted to biomass in the study

area, the  $\delta^{15}\text{N}$  of newly exported particulate organic matter (POM) converges on that of the initial  $\text{NO}_3^-$ .

To verify nutrient drawdown in the study region, temperature and nitrate data were obtained for the  $2 \times 2$  degree grid centered over the coral collection area over the years 1997–1999 (Fig. S1). The years 1997 and 1999 represent warm, WSW-influenced states with the 150–250 m deep layer exhibiting a temperature of  $9^\circ\text{C}$  and  $[\text{NO}_3^-]$  of  $20 \mu\text{M}$  (Fig. S3). The year 1998 represents a cold, LSW-influenced state with a temperature of  $6^\circ\text{C}$  and  $[\text{NO}_3^-]$  of  $15 \mu\text{M}$ . Despite differences in initial slopewater concentrations,  $[\text{NO}_3^-]$  in the productive upper 25 m of the water column was depleted to  $< 1 \mu\text{M}$  by late spring of all years.

**4 Age Models of Fossil Specimens.** In addition to the six recent specimens of *P. resedaeformis*, four fossil specimens were analyzed for  $\delta^{15}\text{N}$ . Age models for two of these specimens, “Fossil-95” (7) and “COHPS-2001-1” (8), were described earlier. The remaining two specimens were dated by conventional  $^{14}\text{C}$  dating. Raw  $^{14}\text{C}$  ages were calibrated with the CALIB program (9) using the Marine04 dataset (10) and corrected for local variation in the marine reservoir age using a  $\Delta R$  (11) value of  $128 \pm 35$  (8).

Specimen “COHPS-2001-2”: 44 growth rings were sampled across the axial radius of the specimen at approximately annual resolution. Sample (growth ring) #43 from the inner region of the skeleton was dated at  $640 \pm 35$  ( $1\sigma$ )  $^{14}\text{C}$  years (Lab code LLNL 111134); calibrated  $1\sigma$  age range of sample = 1716–1874 AD. The maximum age of the oldest sample (#44) = 1716 yrs AD – 1 = 1715 yrs AD. The minimum age of youngest sample (#1) = 1874 yrs AD + 42 yrs = 1916 yrs AD.

Specimen “R6400016-1”: 61 growth rings were sampled across the axial radius at approximately annual resolution. Sample #55 was dated at  $625 \pm 35$  ( $1\sigma$ )  $^{14}\text{C}$  years (Lab code LLNL 111630); calibrated  $1\sigma$  age range of sample = 1727–1951\* AD (\*Samples calibrated to 1951 yrs AD are suspect because they impinge on end of calibration dataset). The maximum age of oldest sample (#61) = 1727 yrs AD – 6 = 1721 yrs AD. The minimum age of youngest sample (#1) = 1951 yrs AD + 54 yrs = 2005 yrs AD. The minimum age was truncated to year of collection (2002).

1. Box GEP, Jenkins GM (1994) *Time Series Analysis: Forecasting and Control* (Prentice-Hall, Upper Saddle River, NJ), 3rd Ed.
2. Pyper BJ, Peterman RM (1998) Comparison of methods to account for autocorrelation in correlation analyses of fish data. *Can J Fish Aquat Sci* 55:2127–2140.
3. Goericke R, Montoya JP, Fry B (1994) in *Stable Isotopes in Ecology and Environmental Science*, eds Lajtha K, Michener RH (Blackwell, Oxford, UK), pp 187–221.
4. Wada E, Hattori A (1978) Nitrogen isotope effects in the assimilation of inorganic nitrogenous compounds by marine diatoms. *Geomicrobiol J* 1:85–101.
5. Altabet MA, Francois R (1994) Sedimentary nitrogen isotopic ratio as a recorder for surface ocean nitrate utilization. *Global Biogeochem Cy* 8:103–116.
6. Needoba JA, Waser NAD, Harrison WG, Calvert SA (2003) Nitrogen isotope fractionation in 12 species of marine phytoplankton during growth on nitrate. *Mar Ecol Prog Ser* 255:81–91.
7. Sherwood OA, Scott DB, Risk MJ (2006) Late Holocene radiocarbon and aspartic acid racemization dating of deep-sea octocorals *Geochim Cosmochim Acta* 70:2806–2814.
8. Sherwood OA, et al. (2008) Late Holocene radiocarbon variability in Northwest Atlantic slope waters. *Earth Plan Sci Lett* 275:146–153.
9. Hughen KA, et al. (2004) Marine04 Marine radiocarbon age calibration, 26-0 ka BP. *Radiocarbon* 46:1059–1086.
10. Stuiver M, Reimer PJ (1993) Extended  $^{14}\text{C}$  database and revised CALIB radiocarbon program. *Radiocarbon* 35:215–230.
11. Stuiver M, Braziunas TF (1993) Modeling atmospheric  $^{14}\text{C}$  influences and  $^{14}\text{C}$  ages of marine samples to 10,000 BC. *Radiocarbon* 35:137–189.
